# Supplementary material
Source: ML conference proceedings conference paper supplement (https://openreview.net/forum?id=xyJ6ivc8ZU)
Supplement: supplementary_material [file Appendix.pdf › supplemental_material/Appendix.pdf]

# Shared Contexts, Personalized Outputs: A Benchmark for Document Generation

## Supplemental Material

### A REPRODUCIBILITY

To ensure full reproducibility of our benchmark and results, we provide all code, scripts, and benchmark outputs as part of the supplemental material. These resources are packaged in a zip file accompanying the submission.

The archive includes:

- Source code and scripts for running all benchmark experiments
- Generated datasets and evaluation pipelines
- Example configuration files and usage instructions
- Complete benchmark results and summary statistics
- All details and artifacts described in the Appendix sections, including prompts, evaluation protocols, and metric definitions

Every step of the benchmark pipeline, from user profile and intent schema detection, context retrieval, document generation, to reference-free LLM judging, are documented and reproducible using the provided materials. The dataset, synthetic queries, and evaluation outputs are included to enable independent verification and extension of our results.

We intend to open source the full benchmark suite after completion of our internal privacy and compliance review. This will ensure that all materials meet organizational standards for responsible data sharing.

### B THE USE OF LARGE LANGUAGE MODELS

Large Language Models (LLMs) play a multifaceted role in both the development and evaluation of our benchmark and in the preparation of this paper.

**Paper Preparation** LLMs were used extensively for proof-reading and grammatical checking throughout the writing process. All sections of the manuscript were reviewed using LLMs to ensure clarity, correctness, and consistency in language.

**Benchmark Dataset and Synthetic Query Generation** For the benchmark itself, LLMs were employed to generate synthetic user queries and conversations. This enabled the creation of diverse, realistic scenarios for evaluating document generation and context retrieval capabilities.

**Reference-free Judging** A core innovation of our benchmark is the use of LLMs as reference-free judges. For each generated document, an LLM is prompted to evaluate quality across multiple dimensions (e.g., personalization fidelity, factuality, citation quality, fluency, structure, temporal accuracy), producing detailed metric scores and feedback in a fully automated manner.

**Benchmark Design and Implementation** Importantly, the overall design, orchestration, and implementation of the benchmark pipeline—including all code and scripts for running experiments, collecting results, and managing evaluation were developed by the authors with limited LLM assistance such as debugging and docstring writing. The logic for data loading, intent schema extraction, context retrieval, and document generation orchestration is entirely author-written.

**Statistical Summarization** For post-processing and summarization of benchmark results, we occasionally leveraged LLMs to generate scripts for statistical analysis and visualization. This use was limited to auxiliary tasks and did not affect the core benchmark logic or evaluation methodology.

**Summary** In summary, LLMs were used for (1) proof-reading and grammar checking of the paper, (2) generating synthetic data and queries, (3) automated judging of benchmark outputs, and (4) assisting with statistical summarization scripts. The benchmark’s conceptual design and implementation remain author-driven, ensuring methodological transparency and reproducibility.

## C PROMPT ENGINEERING FOR MESSAGE GENERATION, SYNTHETIC USER QUERIES, AND LABEL GENERATION

### C.1 PROMPT CONSTRUCTION LOGIC

Message generation in PersonaContextWeaver is grounded in the knowledge graph  $\mathcal{G}$ , which encodes domains, topics, phases, users, and messages, along with their semantic and temporal relations. For each new message node, the framework traverses  $\mathcal{G}$  using predefined path types—**Context Initialization**, **Local Interaction**, and **Context Transition**—to synthesize realistic, multi-user conversational scenarios. Prompts are constructed to encode:

- **Persona attributes:** Role, tone, style, expertise.
- **Project, topic, and phase:** Current context for the message.
- **Situational context  $S_u$ :** Recent messages, metadata, and relevant history.
- **Conversational scenario:** Initial post, reply, cross-role/cross-project interaction, or noise injection.

Depending on the graph traversal path, the prompt is tailored to fit the user’s style and the ongoing thread, ensuring continuity and authenticity.

### C.2 PATH-SPECIFIC PROMPT TEMPLATES AND EXAMPLES

**Context Initialization (Channel Post)** *Scenario:* A user posts an announcement or kickoff message at the start of a phase.

**Prompt Template:**

You’re {user}, creating a new post in your Teams channel about the {phase\_name} phase of {project}.

Your role: {role}

Your expertise: {expertise}

Your style: {tone} and {style}

Current status: {status}

Target date: {target\_date}

Write a channel post that announces this phase and gets the team engaged.

- Make it clear what this phase is about and why it matters
- Include key information the team needs to know
- Ask questions or request input to start discussion
- Use your natural voice and style
- Keep it professional but approachable
- Think about what would make people want to reply and contribute

**Example Output:**

Welcome to the Planning phase, team! Our goal is to outline project risks and set clear milestones. Please review the objectives and share any initial concerns or ideas. Looking forward to a productive start!

**Local Interaction (Threaded Reply)** *Scenario:* A user replies to a colleague’s message within the same phase.

**Prompt Template:**

Background: {user} is a {role} with expertise in {expertise}, communicating in a {tone} tone and {style} style.

Phase: {phase\_name} ({stage} stage – {progress}% complete)

Status Goal: {status}  
 Target Date: {target\_date}  
 Channel Conversation History: {recent\_messages}  
 Task: Write a REPLY in the {project} channel thread. Respond to: {reply\_to}  
 Style Guide:  
 - Reply in a casual, conversational style  
 - Build on what others have said  
 - Use your {tone} tone and {style} style  
 - Keep it concise (1–2 sentences)  
 - Use @mentions and emojis if appropriate  
 Content Focus:  
 - Respond to blockers or questions  
 - Share updates from your area  
 - Propose solutions or alternatives

**Example Output:**

@Sam Good catch on the authentication issue! I'll sync with the backend team and see if we can patch it by tomorrow.

**Context Transition (Cross-Context / Role-to-Role)** *Scenario:* A user from one project/phase joins a discussion in another project's channel, sharing insights or collaborating across domains.

**Prompt Template:**

Background: {user} is a {role} with expertise in {expertise}, communicating in a {tone} tone and {style} style.  
 They are currently working on the {source\_project} project, in the {source\_phase} phase.  
 They are joining a cross-project, same-role discussion in the {target\_project} channel, in a thread about the {topic} domain during its {target\_phase} phase.  
 Recipient is also a {role}.  
 Phase Context: {target\_phase} ({stage} stage – {progress}% complete)  
 Status Goal: {status}  
 Original Post: {post\_content}  
 Thread Context: {recent\_messages}  
 Task: Write a REPLY in this Teams channel thread that reflects your experience from {source\_project}.  
 Guidance:  
 - Share insights from your {source\_project} experience that apply here  
 - Ask thoughtful questions or suggest approaches based on what you've learned  
 - Highlight overlaps or synergies between {source\_project} and {target\_project}  
 - Keep it conversational and helpful—you're a peer offering perspective  
 - Use your {tone} tone and {style} style  
 - End with a question or suggestion that moves the discussion forward

**Example Output:**

Henry, in Healthcare Analytics we found that combining qualitative interviews with quantitative risk scoring helped surface hidden issues. Have you considered integrating stakeholder feedback into your risk models? Curious if your team has faced resistance to new methodologies.

**Noise Message** *Scenario:* Simulates plausible but subtly incorrect or off-topic messages for realism.

**Prompt Template:**

{user} is a {role} who communicates in a {tone} tone and {style} style.  
 They are discussing the topic-{topic}, posting a message during the {phase\_name} phase of the {project} project.  
 Owner: {owner}, Status: {status}, Target Date: {target\_date}  
 Thread Context: {recent\_messages}

Write a plausible but subtly incorrect, confused, or off-topic message that a real team member might send in this context.

Examples: misunderstanding the next step, referencing the wrong deadline, asking an unrelated but believable question, or making a human error.

The message should still sound natural and fit the ongoing conversation.

#### Example Output:

Wait, are we supposed to finish the UI by next Monday or was it the API? Sorry, I got mixed up with the deadlines.

### C.3 PROMPT ADAPTATION AND QUALITY CONTROL

Prompts are dynamically adapted based on:

- **Role and expertise:** Ensures messages reflect authentic perspectives.
- **Phase progress:** Early-stage prompts focus on planning; late-stage prompts drive closure.
- **Communication purpose:** Kickoff, update, blocker, decision, milestone, escalation, coordination.
- **Conversation history:** Maintains continuity and realism in threaded discussions.
- **Noise injection:** Introduces human-like errors and off-topic remarks for realism.

Each generated message is evaluated for coherence, personalization, and structural consistency before being integrated into the evolving conversational graph.

### C.4 CONTROLLING CONVERSATION PROGRESSION

A key aspect of PersonaContextWeaver is the dynamic control of conversation progression, ensuring that synthetic dialogues unfold in a realistic, temporally coherent manner across phases, topics, and projects. The progression logic is tightly coupled to the knowledge graph  $\mathcal{G}$  and leverages both graph traversal and message history to simulate organic team interactions.

**Phase and Message Selection.** For each new message, the system selects a phase and topic by traversing  $\mathcal{G}$  using relation paths (e.g., `has_topic`, `has_phase`), with optional filters to ensure phases are active and have not yet been completed. The selection process is probabilistic and balances between domains, topics, and phases to avoid repetitive or stagnant conversations.

#### Post and Reply Scheduling.

- **Channel Posts:** The type of post (e.g., kickoff, milestone, update, blocker, decision) is determined by the number of existing messages in the phase and the current stage of progression. Early posts tend to be announcements or kickoffs, while later posts reflect ongoing work, blockers, or decisions.
- **Replies:** Replies are scheduled by selecting recent messages within a phase, prioritizing those that have not received sufficient responses. The system avoids repeatedly selecting the same authors, fostering diverse participation.
- **Cross-Project Replies:** For cross-context scenarios, the system identifies users with matching roles across related projects and phases, enabling knowledge transfer and collaborative problem-solving between teams.

**Temporal Realism.** Each message is assigned a timestamp using a bursty, Poisson-like process, ensuring that conversations reflect natural activity patterns (e.g., bursts of replies, lulls between phases). The system checks for phase completion before scheduling new messages, preventing unrealistic activity in closed phases.

**Progression Guidance in Prompts.** Prompts are dynamically adapted to the current stage of the phase (early, middle, late), with explicit guidance for the LLM to focus on appropriate actions:

- **Early Stage:** Emphasize planning, problem identification, and team alignment.
- **Middle Stage:** Focus on solution development, status updates, and collaborative progress.

- **Late Stage:** Drive closure, confirm deliverables, and resolve outstanding issues.

For example, a late-stage prompt may include: “We’re at 90% through this phase (ending soon). The phase **MUST** achieve ‘Completed’ status. Focus on finalizing decisions, confirming completions, and closing out open items.”

**Quality Control.** The system evaluates each generated message for coherence, relevance, and structural consistency before integrating it into the evolving conversation. Noise messages are occasionally injected to simulate human error and maintain realism.

## C.5 SYNTHETIC CONVERSATION QUALITY

**Synthetic Conversation Evaluation Metrics** For all synthetic group chat data, we report quality using six core metrics, each scored by LLM-as-Judge protocols (e.g., G-Eval) on a scale from 1 to 5, with higher values indicating better performance:

- **Naturalness:** Measures how authentic and human-like the conversation appears. High scores indicate messages resemble real workplace communication, with natural phrasing and plausible imperfections.
- **Coherence:** Assesses the logical flow and connectivity between messages. Coherent conversations maintain topic continuity and clear transitions, avoiding abrupt or confusing shifts.
- **Diversity:** Captures the variety in communication styles, topics, and participant contributions. High diversity reflects a mix of message lengths, tones, and perspectives, avoiding repetitive exchanges.
- **Contextual Relevance:** Evaluates how well each message relates to the shared context and ongoing discussion. Relevant conversations consistently reference prior messages, project details, and team objectives.
- **Momentum:** Measures the degree to which the conversation progresses toward goals or resolutions. High momentum indicates that messages drive the discussion forward, address blockers, and facilitate decision-making.
- **Engagingness:** Assesses how interactive and stimulating the conversation is for participants. Engaging conversations feature active participation, questions, acknowledgments, and responses that encourage further dialogue.
- **Overall Avg.:** The arithmetic mean of the above metrics, providing a single summary score for overall conversation quality.

These metrics collectively capture the realism, effectiveness, and collaborative dynamics of synthetic workplace conversations, enabling nuanced evaluation and comparison across datasets.

**Analysis of Synthetic Conversation Quality Metrics** Table 4 presents a comparative evaluation of synthetic group chat data across six key metrics, benchmarked against both a baseline (single prompt) and real-world conversations. First, the real-world upper bound achieves near-perfect scores ( $\geq 4.9$ ) across all metrics, confirming that authentic workplace conversations are consistently natural, coherent, diverse, contextually relevant, goal-driven, and engaging. Second, the baseline (single prompt) scenario shows moderate performance, with overall average quality (3.85) notably lower than real-world data. While naturalness, coherence, and contextual relevance are reasonably high (4.00), diversity (3.70) and engagingness (3.10) are limited, suggesting that single-prompt generation tends to produce repetitive and less interactive exchanges. Third, synthetic datasets generated by PersonaContextWeaver (Technology, Healthcare, Manufacturing, Finance) approach real-world quality, with overall averages between 4.90 and 4.98. Naturalness, contextual relevance, momentum, and engagingness consistently reach the maximum score (5.00 or close), indicating that the synthesis pipeline effectively captures the authentic dynamics of workplace group chats. Fourth, minor variations are observed in coherence and diversity across domains. For example, Manufacturing shows slightly lower diversity ( $4.70 \pm 0.46$ ) and engagingness ( $4.90 \pm 0.30$ ), while Technology and Finance exhibit modest drops in coherence ( $4.60 \pm 0.49$ ). These differences may reflect domain-specific communication patterns or the inherent complexity of certain topics. Overall, the results demonstrate that high-quality synthetic conversations can closely match real-world standards across multiple dimensions, especially when generated using structured, context-aware pipelines. However, achieving full diversity and engagingness remains challenging for baseline approaches, highlighting the importance of multi-turn, persona-driven synthesis for realistic team interactions.

## C.6 SYNTHETIC QUERY AND LABEL GENERATION

To benchmark contextual document generation, we synthesize realistic user queries and corresponding ground-truth labels using a multi-stage process grounded in the knowledge graph  $\mathcal{G}$ . This process ensures that each query is context-aware, temporally plausible, and paired with interpretable labels for evaluation.

**Step 1: Sampling User and Context.** We begin by sampling a target user node from  $\mathcal{G}$ , extracting the user’s persona (role, tone, style, expertise) and their involvement in domains, topics, and phases. For each query, we randomly select either a phase or topic that the user is actively engaged in, ensuring diversity across document types (status report, email, FAQ).

**Step 2: Extracting Contextual Markers.** For the selected phase or topic, we traverse the graph to collect contextual markers from connected messages. These markers include:

- **Entities:** Projects, tools, concepts, people/roles.
- **Temporal Expressions:** Dates, deadlines, milestones.
- **User Actions:** Requests, suggestions, decisions.
- **Key Decisions:** Conclusions, owner assignments, approvals.
- **Unresolved Questions:** Blockers, concerns, open issues.
- **Mentioned Tools:** Software, platforms, systems.
- **Deliverable Sources:** URLs, file paths, document references.
- **Project Context:** Project name, topic, phase, status, owner, dates.

Markers are extracted using either LLM-based analysis or regex-based heuristics, with each marker linked to its source message for traceability.

**Step 3: Sampling Query Timestamp.** A realistic timestamp is sampled for each query, typically during or shortly after the relevant phase, to ensure temporal coherence. This timestamp is used to filter contextual markers and ground-truth messages, so that only information available up to the query time is considered.

**Step 4: Generating Intent Schema.** We construct a structured intent schema for each query, specifying:

- **Document Type:** Status report, email, or FAQ.
- **Target Audience:** Executives, team members, stakeholders, etc.
- **Temporal Scope:** Last week, past month, ongoing, upcoming, etc.
- **Detail Level:** Summary, detailed, comprehensive.
- **Tone:** Formal, technical, conversational, urgent, etc.
- **Visual Elements:** Charts, tables, dashboards, etc.
- **Format Instruction:** How to organize and present the document.
- **Document Structure:** Key sections to include.
- **Special Instruction:** Any specific requirements or constraints.

The intent schema is generated using an LLM prompt that incorporates the user profile and project context, ensuring that the schema is realistic and tailored to the scenario.

**Step 5: Synthesizing the User Query.** A natural language query is generated using the intent schema, contextual markers, and user persona. The LLM is prompted to produce a concise, context-aware request that reflects real workplace behavior, without explicitly mentioning document types. Example prompt:

Generate a concise but natural workplace request about fraud detection.  
Context:  
- Project: Treasury Modernization  
- Topic: Fraud Detection  
- User Role: Risk Analyst

The user needs information quickly, about recent progress, for leadership, including key progress and what’s coming up next.

Requirements:

1. Do not mention document types like “status report” or “email”.
2. Use natural business language.
3. Make the request sound conversational and realistic.
4. Reference the project/topic naturally.
5. Subtly hint at the content areas needed without being too explicit.

#### Example Output:

Can you help me get up to speed on where we are with fraud detection—I need the key progress and what’s coming up next?

**Step 6: Ground-Truth Label Collection.** For each query, we collect the set of ground-truth messages from the graph that are relevant to the selected phase or topic and occurred before the query timestamp. These message IDs serve as the gold standard for context retrieval and evaluation.

**Step 7: Output Structure.** Each synthetic query is paired with rich metadata for evaluation:

- The generated query text.
- Document type, target node, user ID, timestamp.
- User persona and involvement context.
- Intent schema (structured label).
- Contextual markers (with source tracking).
- Ground-truth message IDs.

This pipeline produces a diverse set of synthetic queries and corresponding labels, enabling fine-grained evaluation of contextual document generation models. Each query is grounded in realistic user behavior, project context, and temporal constraints, with interpretable labels for intent, context, and ground-truth evidence.

### C.7 GOLDEN DOCUMENT GENERATION PIPELINE

To ensure the quality and reliability of reference documents for evaluation, we adopt an iterative optimization workflow that integrates LLM-based assessment, targeted editing, and manual curation. The following steps summarize the pipeline:

#### 1. Initial Draft Generation:

- For each synthetic query, generate an initial document draft using the best-performing LLM, grounded in the relevant context and intent schema.

#### 2. Section Chunking:

- Split the draft into logical sections (e.g., by markdown headings or dividers) for fine-grained evaluation.

#### 3. Automated Evaluation:

- For each section, apply a suite of LLM-as-judge metrics (accuracy, relevance, readability, redundancy, tone, detail level, specificity) to identify issues and assign scores.

#### 4. Targeted Editing:

- Sections with low scores or flagged issues are revised using targeted LLM editing prompts or manual intervention, focusing on factual grounding, evidence attribution, and persona fidelity.
- Merge updated sections back into the document, preserving original order.

#### 5. Iterative Refinement:

- Repeat evaluation and editing until all sections meet predefined quality thresholds.

#### 6. Final Assembly:

- Combine all revised sections into the final golden document, which serves as the reference for benchmarking.

**Algorithm 1** Golden Document Generation Workflow

---

```

1: for each synthetic query do
2:   Generate initial draft using best-performing LLM (grounded in context and intent)
3:   Chunk draft into logical sections
4:   repeat
5:     Evaluate each section with LLM-as-judge metrics (accuracy, structure, personalization)
6:     Revise low-scoring/problematic sections via targeted LLM editing or manual curation
7:   until all sections meet quality thresholds
8:   Assemble revised sections into the final golden document
9: end for

```

---

**Pseudocode Illustration**

**Quality Control** Each golden document is validated for coverage of required sections, correct evidence IDs, and persona fidelity. The iterative workflow ensures that reference documents are both contextually accurate and personalized, supporting robust evaluation of model outputs.

**D BENCHMARK DETAILS****D.1 USER PROFILE INFERENCE PROMPTS AND EXAMPLE**

**Prompt Template** The following prompt is used to infer the user profile from a set of messages:

Analyze the following messages from user '{user\_id}' and infer their professional profile.

Messages: {message\_content}

Based on these messages, please infer their profile using **ONLY** the following predefined options:

- Professional role: Choose the most fitting role from common workplace positions (e.g., Product Manager, Data Analyst, IT Systems Lead, Software Engineer, Project Manager, Business Analyst, etc.)
- Expertise level: Choose from [novice, intermediate, expert]
- Communication style: Choose from [concise, elaborative, standard, bullet-pointed]
- Tone: Choose from [formal, professional, technical, conversational, direct, persuasive, empathetic, accessible]
- Domain knowledge areas: List relevant technical/business domains
- Project involvement/responsibilities: List inferred responsibilities
- Confidence score (0-1) for your inference

**IMPORTANT:** You must select exact values from the predefined options for expertise\_level, communication\_style, and tone. Do not use synonyms or variations.

Respond in JSON format:

```

{
  "role": "...",
  "expertise_level": "novice|intermediate|expert",
  "communication_style": "concise|elaborative|standard|bullet-pointed",
  "tone": "formal|professional|technical|conversational|direct|persuasive|empathetic",
  "domain_knowledge": ["...", "..."],
  "project_involvement": ["...", "..."],
  "confidence_score": 0.85
}

```

**Example** Suppose the user messages are:

Message 1: "Let's ensure the Q3 financial summary is ready for the executive review."  
 Message 2: "Please use bullet points for key risks and a table for compliance status."  
 Message 3: "Our audience is the management team; keep the tone formal and concise."



**User Profile Output:**

```
{
  "role": "Finance Manager",
  "expertise_level": "expert",
  "communication_style": "concise",
  "tone": "formal",
  "domain_knowledge": ["finance", "compliance"],
  "project_involvement": ["executive reporting", "risk assessment"],
  "confidence_score": 0.95
}
```

**D.2 INTENT DETECTION PROMPTS AND EXAMPLE**

**Prompt Template** The following prompt is used for intent schema extraction:

Analyze the following user query and extract the structured intent for document generation.

User Query: "{query}"

Context Information: - Document Type: {context.get('document\_type', 'Unknown')} - Contextual

Markers: {context.get('contextual\_markers', {})}

Extract and structure the following intent components using ONLY the predefined options:

- Document type: Choose from [status\_report, email, faq]
- Target audience: Choose from [executives, team\_members, stakeholders, management, clients, board]
- Temporal scope: Choose from [last\_week, past\_month, quarter, project\_start, ongoing, upcoming, last\_two\_weeks]
- Detail level: Choose from [summary, detailed, comprehensive, high\_level]
- Tone: Choose from [formal, technical, conversational, executive, urgent, celebratory, accessible]
- Format instruction: Describe specific formatting requirements (bullet\_points, paragraphs, tables\_charts, mixed, etc.)
- Document structure: List the main sections or topics that should be covered
- Visual elements: List any visual elements needed (charts\_and\_graphs, progress\_bars, status\_tables, etc.)

**IMPORTANT:** You must select exact values from the predefined options for document\_type, target\_audience, temporal\_scope, detail\_level, and tone. Do not use synonyms or variations.

Respond in JSON format:

```
{
  "document_type": "status_report|email|faq",
  "target_audience": "executives|team_members|stakeholders|management|clients|board",
  "temporal_scope": "last_week|past_month|quarter|project_start|ongoing|upcoming|last_two_weeks",
  "detail_level": "summary|detailed|comprehensive|high_level",
  "tone": "formal|technical|conversational|executive|urgent|celebratory|accessible",
  "format_instruction": "...",
  "document_structure": ["...", "..."],
  "visual_elements": ["...", "..."]
}
```

**Example** Suppose the user query is: Generate a quarterly status report for management, focusing on compliance and financials, using bullet points and tables where appropriate.

**Intent Schema Output:**

```
{
  "document_type": "status_report",
```

```

1080     "target_audience": "management",
1081     "temporal_scope": "quarter",
1082     "detail_level": "detailed",
1083     "tone": "formal",
1084     "format_instruction": "bullet points for risks, tables for compliance and financials",
1085     "document_structure": ["executive summary", "financial overview", "compliance status", ""]
1086     "visual_elements": ["tables"]
1087 }

```

### D.3 CONTEXT RETRIEVAL PROMPT AND EXAMPLE

**Prompt Template** The following prompt is used for context retrieval (see `retrieve_relevant_context`):

```

1092     Given a user query and document intent, select the most relevant messages from the conversation
1093     history.
1094     User Query: "{query}"
1095     Document Intent:
1096         • - Document Type: {intent.document_type}
1097         • Target Audience: {intent.target_audience}
1098         • Temporal Scope: {intent.temporal_scope}
1099         • Detail Level: {intent.detail_level}
1100         • Tone: {intent.tone_preference}
1101         • Specific Topics: {'', '.join(intent.specific_topics) if intent.specific_topics else 'None'}
1102     Available Messages (all temporally filtered messages): {formatted messages}
1103     These are all {N} temporally filtered messages (messages that occurred before the query timestamp).
1104     Select the {num_target_messages} most relevant messages that would be needed to generate the
1105     requested document.
1106     Consider: 1. Temporal relevance (matches the temporal scope) 2. Content relevance (contains
1107     information needed for the document) 3. Author relevance (messages from key stakeholders) 4.
1108     Topic alignment (discusses relevant topics) 5. No duplicated or near-duplicate messages
1109     Respond with a JSON list of message IDs in order of relevance:
1110     ["Msg_101", "Msg_115", "Msg_120", ...]

```

**Example** Suppose the available messages are:

```

1115 [Msg_101] Alice (2025-07-01): "Q3 financials are finalized."
1116 [Msg_102] Bob (2025-07-02): "Compliance review scheduled for July 10."
1117 [Msg_103] Alice (2025-07-03): "Key risk: delayed vendor payments."
1118 [Msg_104] Carol (2025-07-04): "Team lunch next Friday."
1119 [Msg_105] Bob (2025-07-05): "All compliance documents uploaded."

```

**User Query:** Generate a quarterly status report for management, focusing on compliance and financials.

**Intent Schema:**

```

1124 {
1125     "document_type": "status_report",
1126     "target_audience": "management",
1127     "temporal_scope": "quarter",
1128     "detail_level": "detailed",
1129     "tone": "formal",
1130     "specific_topics": ["compliance", "financials"]
1131 }

```

**Model Output (Relevant Message IDs):**

```

1132 ["Msg_101", "Msg_102", "Msg_103", "Msg_105"]
1133

```

#### D.4 REFERENCE-FREE LLM JUDGES

For reference-free evaluation in the PersonaContextWeaver benchmark, we employ an LLM-as-a-Judge protocol implemented in `document_generation.py`. This protocol uses a large language model to score generated documents across six key dimensions, using a systematic, step-by-step prompt and JSON output for consistency and transparency.

**Evaluation Dimensions** Each generated document is evaluated across six dimensions, each scored on a scale from 1 to 5:

- **Personalization Fidelity:** Assesses how well the document reflects the intended user persona, including role, tone, audience, and temporal scope.
- **Factuality:** Measures the accuracy of claims made in the document, ensuring they are supported by cited evidence from the source context.
- **Citation Quality:** Evaluates whether citations are correctly formatted, relevant, appropriately placed, and sufficiently cover factual content.
- **Fluency:** Examines the clarity, grammatical correctness, and readability of the document, as well as its appropriateness for the target audience.
- **Structure:** Reviews the logical organization, formatting, and completeness of the document, including adherence to professional standards.
- **Temporal and Task Accuracy:** Checks whether the document content aligns with the specified timeframe and reflects the correct project phase or task context.

**Prompt Template** The following prompt is programmatically constructed and sent to the LLM for each evaluation (see `evaluate_document_quality` in `document_generation.py`):

Evaluate the quality of the following generated document using a systematic evaluation process.

ORIGINAL USER QUERY: {query}

{intent context}{profile context}{temporal context}

DOCUMENT TO EVALUATE: {document.content}

CITATIONS USED: {citations.json}

EVALUATION PROCESS: Evaluate each metric systematically using the specific guidelines below:

FOR EACH METRIC, FOLLOW THESE DETAILED STEPS:

##### 1. Personalization Fidelity Evaluation

- Identify document type from structure and content
- Compare identified type with expected type specification
- Analyze tone and style used throughout document
- Verify tone matches target audience and requirements
- Check temporal scope references in content
- Assess if detail level matches specified requirements
- Review format compliance with specified requirements
- Score 1–5: How well does document reflect intended specifications?

##### 2. Factuality Evaluation

- Identify all factual claims and assertions in document
- For each claim, locate corresponding citation and source
- Verify facts against actual cited source content
- Check for any unsupported or speculative statements
- Look for contradictions between claims and sources
- Assess overall factual accuracy and evidence backing
- Score 1–5: How well are claims supported by evidence?

##### 3. Citation Quality Evaluation

- Check all citation formats for proper [Msg.XXX] structure

- Verify each cited message ID exists and is accessible
- For each citation, confirm it supports the accompanying claim
- Assess appropriateness of citation placement in text
- Evaluate sufficiency of citation coverage for factual content
- Check for any missing citations for factual statements
- Score 1–5: How accurate and appropriate are the citations?

#### 4. Fluency Evaluation

- Read through document checking for clarity and comprehension
- Identify any grammatical errors or awkward phrasing
- Assess logical flow and transitions between ideas
- Evaluate language appropriateness for target audience
- Check for engaging and professional writing style
- Review overall readability and coherence
- Score 1–5: How clear and well-written is the document?

#### 5. Structure Evaluation

- Analyze overall document organization and logical flow
- Check if structure is appropriate for document type
- Evaluate headings, formatting, and visual layout
- Assess completeness of necessary sections
- Review adherence to professional document standards
- Check for logical progression from introduction to conclusion
- Score 1–5: How well-organized and structured is the document?

#### 6. Temporal and Task Accuracy Evaluation

- Identify temporal scope specified in requirements
- Check all time references in document for accuracy
- Cross-reference content timeframe with citation timestamps
- Verify temporal expressions (dates, deadlines) are appropriate
- Assess if content reflects correct project phase/period
- Look for any temporal inconsistencies or anachronisms
- Score 1–5: How accurately does content align with specified timeframe?

FINAL SCORING: For each metric, provide a score (1–5) based on your systematic evaluation.  
Respond in JSON format:

```
{
  "personalization_fidelity": 4,
  "factuality": 3,
  "citation_quality": 4,
  "fluency": 5,
  "structure": 4,
  "temporal_task_accuracy": 4,
  "overall_score": 4.0,
  "detailed_feedback": "METRIC-BY-METRIC EVALUATION: ... [OVERALL SUMMARY] ..."
}
```

#### Implementation Details

- **Model:** All evaluations are performed using GPT-4.1 or newer models.
- **Parameters:** Temperature is set to 0.1 for consistency. The prompt is delivered as a user message, and the LLM is instructed to respond only with valid JSON.
- **Scoring:** Scores for each dimension are aggregated into an overall metric. Qualitative feedback is provided for interpretability.
- **Automation:** The evaluation pipeline is fully automated and integrated in `document_generation.py`, ensuring reproducibility.

**Example Output** The following is a representative JSON output from the LLM-as-a-Judge protocol:

```
{
  "personalization_fidelity": 4,
  "factuality": 4,
  "citation_quality": 4,
  "fluency": 5,
  "structure": 5,
  "temporal_task_accuracy": 5,
  "detailed_feedback": "METRIC-BY-METRIC EVALUATION: [PERSONALIZATION FIDELITY] Steps
    1a-1g assessment: The document is clearly a status_report, matching the expected
    type. The tone is executive and professional, suitable for management, and the
    detail level is comprehensive. The temporal scope is explicitly stated as Q3 2025
    and is referenced throughout. Formatting requirements are met: narrative
    paragraphs for summaries, bullet points for actions/issues, and tables for
    financials and compliance tracking. Minor deduction for placeholder financial
    figures (X, Y, Z, etc.), which slightly reduces personalization completeness. [
    FACTUALITY] Steps 2a-2f assessment: All major factual claims (milestone
    completion, compliance phase status, actions taken, risks, and open issues) are
    supported by the provided citations. There are no unsupported or speculative
    statements, and no contradictions with the cited sources. The only minor issue is
    the lack of actual financial data, but this is transparently noted as pending. [
    CITATION QUALITY] Steps 3a-3f assessment: All citations use the correct [Msg_XXX]
    format and refer to valid message IDs present in the citation list. Citations
    are appropriately placed after factual claims and cover all key assertions. There
    are no missing citations for factual statements. Placement is generally
    appropriate, though some sections could benefit from more granular citation (e.g
    ., individual bullet points). [FLUENCY] Steps 4a-4f assessment: The document is
    clear, well-written, and free of grammatical errors. The language is professional
    and appropriate for an executive audience. Transitions between sections are
    logical, and the writing style is engaging and concise. Readability and coherence
    are excellent. [STRUCTURE] Steps 5a-5f assessment: The document is well-
    organized, with all required sections present and clearly labeled. Headings,
    bullet points, and tables are used effectively, and the logical flow from
    introduction to conclusion is strong. The structure adheres to professional
    standards for status reports. [TEMPORAL ACCURACY] Steps 6a-6f assessment: The
    temporal scope (Q3 2025) is consistently referenced, and all content aligns with
    the specified period. Citation timestamps are within the correct timeframe, and
    there are no temporal inconsistencies or anachronisms. The document accurately
    reflects the current project phase and period. [OVERALL SUMMARY] Key strengths
    include strong alignment with specifications, comprehensive coverage of required
    topics, clear and professional writing, and robust structure. The main area for
    improvement is the use of placeholder financial data, which, while transparently
    noted, slightly reduces the document's completeness and personalization. Overall,
    the document is highly effective and meets the requirements for a management-
    level quarterly status report."
}
```

## D.5 DETAILS OF BENCHMARK RESULTS BY DATASETS

We provide detailed evaluation results on each dataset in Table 7 8, 9, 10.

## D.6 DETAILS OF INTENT DETECTION BY FIELDS

Table 11 shows the per-field mean Precision, Recall, and F1 scores for intent schema extraction across five LLMs (GPT-4o, GPT-4.1, O4-mini, GPT-5-chat, GPT-5). The benchmark task requires models to infer structured fields such as Document Type, Target Audience, Temporal Scope, Detail Level, and Tone Preference from realistic user queries.

First, all models achieve near-perfect performance on Document Type ( $F1 \geq 0.94$ ). This result highlights that explicit cues in user queries—such as requests for an “overview,” “summary,” or “update”—enable LLMs to reliably identify the intended document type. The consistently high scores across models suggest that this field is well-aligned with surface-level lexical patterns and is less sensitive to model architecture or prompt ambiguity.

Table 7: Performance Metrics for Finance Dataset

| Task                                         | Metric                                    | GPT-4o | GPT-4.1 | O4-mini | GPT-5-chat | GPT-5 |
|----------------------------------------------|-------------------------------------------|--------|---------|---------|------------|-------|
| <b>Profile &amp; Intent Detection</b>        | User Profile Accuracy $\uparrow$          | 0.37   | 0.40    | 0.40    | 0.37       | 0.39  |
|                                              | Intent Accuracy $\uparrow$                | 0.52   | 0.49    | 0.49    | 0.50       | 0.46  |
| <b>Context Filtering</b>                     | Precision $\uparrow$                      | 0.30   | 0.17    | 0.18    | 0.19       | 0.23  |
|                                              | Recall $\uparrow$                         | 0.15   | 0.15    | 0.12    | 0.18       | 0.23  |
|                                              | F1-score $\uparrow$                       | 0.18   | 0.15    | 0.13    | 0.18       | 0.23  |
| <b>Document Generation (Reference-Free)</b>  | Citation Accuracy (0.0 - 1.0) $\uparrow$  | 0.10   | 0.13    | 0.14    | 0.16       | 0.20  |
|                                              | Personalization Fidelity (1-5) $\uparrow$ | 4.40   | 4.10    | 4.23    | 4.80       | 4.25  |
|                                              | Factuality (1-5) $\uparrow$               | 4.23   | 3.80    | 4.05    | 4.98       | 3.38  |
|                                              | Fluency (1-5) $\uparrow$                  | 4.98   | 5.00    | 4.95    | 5.00       | 4.95  |
|                                              | Structure (1-5) $\uparrow$                | 4.50   | 4.50    | 4.85    | 4.95       | 4.75  |
|                                              | Temporal Accuracy (1-5) $\uparrow$        | 4.28   | 4.20    | 4.60    | 4.93       | 4.03  |
| <b>Document Generation (Reference-based)</b> | ROUGE-1 $\uparrow$                        | 0.35   | 0.38    | 0.29    | 0.32       | 0.40  |
|                                              | ROUGE-L $\uparrow$                        | 0.13   | 0.14    | 0.11    | 0.12       | 0.13  |
|                                              | METEOR $\uparrow$                         | 0.22   | 0.23    | 0.14    | 0.19       | 0.24  |

Table 8: Performance Metrics for Healthcare Dataset

| Task                                         | Metric                                    | GPT-4o | GPT-4.1 | O4-mini | GPT-5-chat | GPT-5 |
|----------------------------------------------|-------------------------------------------|--------|---------|---------|------------|-------|
| <b>Profile &amp; Intent Detection</b>        | User Profile Accuracy $\uparrow$          | 0.43   | 0.43    | 0.40    | 0.41       | 0.42  |
|                                              | Intent Accuracy $\uparrow$                | 0.53   | 0.47    | 0.47    | 0.48       | 0.43  |
| <b>Context Filtering</b>                     | Precision $\uparrow$                      | 0.25   | 0.21    | 0.22    | 0.24       | 0.26  |
|                                              | Recall $\uparrow$                         | 0.15   | 0.19    | 0.17    | 0.22       | 0.26  |
|                                              | F1-score $\uparrow$                       | 0.16   | 0.20    | 0.18    | 0.22       | 0.26  |
| <b>Document Generation (Reference-Free)</b>  | Citation Accuracy (0.0 - 1.0) $\uparrow$  | 0.08   | 0.14    | 0.15    | 0.17       | 0.24  |
|                                              | Personalization Fidelity (1-5) $\uparrow$ | 4.38   | 4.13    | 4.60    | 4.73       | 4.35  |
|                                              | Factuality (1-5) $\uparrow$               | 4.30   | 3.75    | 4.43    | 4.98       | 3.50  |
|                                              | Fluency (1-5) $\uparrow$                  | 4.98   | 5.00    | 4.95    | 5.00       | 4.98  |
|                                              | Structure (1-5) $\uparrow$                | 4.53   | 4.55    | 4.98    | 4.95       | 4.75  |
|                                              | Temporal Accuracy (1-5) $\uparrow$        | 4.25   | 4.18    | 4.73    | 4.95       | 4.13  |
| <b>Document Generation (Reference-based)</b> | ROUGE-1 $\uparrow$                        | 0.35   | 0.37    | 0.29    | 0.31       | 0.41  |
|                                              | ROUGE-L $\uparrow$                        | 0.13   | 0.13    | 0.11    | 0.12       | 0.14  |
|                                              | METEOR $\uparrow$                         | 0.22   | 0.21    | 0.14    | 0.17       | 0.23  |

Second, moderate scores are observed for Target Audience ( $F1 \approx 0.60$ - $0.70$ ) and Detail Level. For Target Audience, models benefit from queries that mention specific roles or stakeholders (e.g., “management,” “leadership,” “stakeholders”), but performance drops when the audience is implied rather than explicit. For Detail Level, GPT-4o leads ( $F1 = 0.50$ ), indicating some ability to distinguish between requests for summaries versus detailed breakdowns. However, the variability across models suggests that granularity cues are often subtle and may require more sophisticated context modeling.

Third, Temporal Scope and Tone Preference remain challenging for all models ( $F1 \leq 0.36$  and  $F1 \leq 0.17$ , respectively). Temporal expressions such as “recent progress,” “so far,” or “on the horizon” are frequently present in queries, but models struggle to consistently map these to a structured temporal field. Similarly, tone is often implicit—embedded in the phrasing or urgency of the request—making it difficult for models to extract reliably. These results indicate that fields requiring deeper semantic or pragmatic reasoning are not yet robustly handled by current LLMs.

Fourth, GPT-4o and GPT-4.1 demonstrate balanced performance across most fields, suggesting that effective generalization and instruction following capabilities. In contrast, GPT-5 variants underperform in extracting detail level and tone, possibly reflecting differences in model tuning, context window management, or training data emphasis. These findings underscore the importance of aligning model selection and prompt design with the specific personalization and grounding requirements of downstream applications, especially for tasks involving nuanced or implicit user intent.

In summary, these results reveal that while LLMs are highly effective at extracting explicit and well-cued fields, substantial challenges remain for fields that require nuanced contextual or stylistic reasoning. To advance intent schema extraction, future work should focus on enhancing models’ ability to interpret implicit cues, leverage richer context representations, and incorporate prompt engineering strategies that clarify temporal and tonal requirements. Additionally, expanding training data to include more diverse examples of implicit intent and developing evaluation

Table 9: Performance Metrics for Manufacturing Dataset

| Task                                             | Metric                                    | GPT-4o | GPT-4.1 | O4-mini | GPT-5-chat | GPT-5 |
|--------------------------------------------------|-------------------------------------------|--------|---------|---------|------------|-------|
| <b>Profile &amp; Intent Detection</b>            | User Profile Accuracy $\uparrow$          | 0.58   | 0.60    | 0.56    | 0.54       | 0.48  |
|                                                  | Intent Accuracy $\uparrow$                | 0.53   | 0.49    | 0.48    | 0.52       | 0.46  |
| <b>Context Filtering</b>                         | Precision $\uparrow$                      | 0.32   | 0.17    | 0.10    | 0.20       | 0.25  |
|                                                  | Recall $\uparrow$                         | 0.14   | 0.14    | 0.09    | 0.17       | 0.25  |
|                                                  | F1-score $\uparrow$                       | 0.17   | 0.15    | 0.09    | 0.18       | 0.25  |
| <b>Document Generation<br/>(Reference-Free)</b>  | Citation Accuracy (0.0 - 1.0) $\uparrow$  | 0.11   | 0.11    | 0.10    | 0.16       | 0.22  |
|                                                  | Personalization Fidelity (1-5) $\uparrow$ | 4.43   | 4.10    | 4.53    | 4.60       | 4.19  |
|                                                  | Factuality (1-5) $\uparrow$               | 4.35   | 3.48    | 4.03    | 4.88       | 3.48  |
|                                                  | Fluency (1-5) $\uparrow$                  | 5.00   | 5.00    | 4.88    | 4.88       | 4.93  |
|                                                  | Structure (1-5) $\uparrow$                | 4.50   | 4.35    | 4.83    | 4.83       | 4.72  |
|                                                  | Temporal Accuracy (1-5) $\uparrow$        | 4.33   | 4.18    | 4.78    | 4.78       | 4.18  |
| <b>Document Generation<br/>(Reference-based)</b> | ROUGE-1 $\uparrow$                        | 0.35   | 0.38    | 0.27    | 0.31       | 0.42  |
|                                                  | ROUGE-L $\uparrow$                        | 0.13   | 0.13    | 0.10    | 0.12       | 0.13  |
|                                                  | METEOR $\uparrow$                         | 0.24   | 0.23    | 0.13    | 0.18       | 0.25  |

Table 10: Performance Metrics for Technology Dataset

| Task                                             | Metric                                    | GPT-4o | GPT-4.1 | O4-mini | GPT-5-chat | GPT-5 |
|--------------------------------------------------|-------------------------------------------|--------|---------|---------|------------|-------|
| <b>Profile &amp; Intent Detection</b>            | User Profile Accuracy $\uparrow$          | 0.54   | 0.56    | 0.45    | 0.49       | 0.48  |
|                                                  | Intent Accuracy $\uparrow$                | 0.55   | 0.56    | 0.53    | 0.51       | 0.46  |
| <b>Context Filtering</b>                         | Precision $\uparrow$                      | 0.21   | 0.22    | 0.13    | 0.22       | 0.25  |
|                                                  | Recall $\uparrow$                         | 0.12   | 0.16    | 0.09    | 0.19       | 0.25  |
|                                                  | F1-score $\uparrow$                       | 0.14   | 0.17    | 0.10    | 0.20       | 0.25  |
| <b>Document Generation<br/>(Reference-Free)</b>  | Citation Accuracy (0.0 - 1.0) $\uparrow$  | 0.12   | 0.15    | 0.11    | 0.19       | 0.22  |
|                                                  | Personalization Fidelity (1-5) $\uparrow$ | 4.35   | 4.20    | 4.31    | 4.83       | 4.19  |
|                                                  | Factuality (1-5) $\uparrow$               | 4.35   | 3.70    | 4.30    | 4.98       | 3.48  |
|                                                  | Fluency (1-5) $\uparrow$                  | 5.00   | 5.00    | 4.93    | 5.00       | 4.93  |
|                                                  | Structure (1-5) $\uparrow$                | 4.50   | 4.43    | 4.90    | 4.93       | 4.72  |
|                                                  | Temporal Accuracy (1-5) $\uparrow$        | 4.33   | 4.23    | 4.49    | 4.90       | 4.18  |
| <b>Document Generation<br/>(Reference-based)</b> | ROUGE-1 $\uparrow$                        | 0.35   | 0.37    | 0.28    | 0.31       | 0.40  |
|                                                  | ROUGE-L $\uparrow$                        | 0.13   | 0.13    | 0.11    | 0.12       | 0.13  |
|                                                  | METEOR $\uparrow$                         | 0.23   | 0.22    | 0.13    | 0.19       | 0.24  |

protocols that reward semantic and pragmatic understanding will be critical for improving performance on complex, real-world document generation tasks.

Table 11: Per-field mean Precision / Recall / F1 for Intent Schema Extraction Across Models

| Field           | GPT-4o             | GPT-4.1            | O4-mini            | GPT-5-chat         | GPT-5              |
|-----------------|--------------------|--------------------|--------------------|--------------------|--------------------|
| Target Audience | 0.70 / 0.70 / 0.70 | 0.66 / 0.66 / 0.66 | 0.62 / 0.62 / 0.62 | 0.64 / 0.64 / 0.64 | 0.60 / 0.60 / 0.60 |
| Temporal Scope  | 0.30 / 0.30 / 0.30 | 0.33 / 0.33 / 0.33 | 0.35 / 0.35 / 0.35 | 0.34 / 0.34 / 0.34 | 0.36 / 0.36 / 0.36 |
| Detail Level    | 0.50 / 0.50 / 0.50 | 0.36 / 0.36 / 0.36 | 0.43 / 0.43 / 0.43 | 0.37 / 0.37 / 0.37 | 0.29 / 0.29 / 0.29 |
| Document Type   | 0.99 / 0.99 / 0.99 | 1.00 / 1.00 / 1.00 | 0.94 / 0.94 / 0.94 | 0.99 / 0.99 / 0.99 | 0.98 / 0.98 / 0.98 |
| Tone Preference | 0.16 / 0.16 / 0.16 | 0.17 / 0.17 / 0.17 | 0.12 / 0.12 / 0.12 | 0.15 / 0.15 / 0.15 | 0.08 / 0.08 / 0.08 |
